# Supplementary material
Source: publisher site journal article supplement (https://www.dovepress.com/article/314020)
Supplement: Supplementary file 1 [file get_supplementary_file.php]

# **Supplemental Material**

## **Appendix A: Search strategy**

Interrupted Time Series Analysis/

interrupted time series.tw,kw.

(segmented adj3 regression).tw,kw.

arima.tw,kw.

autoregressive integrated moving average.tw,kw.

1 or 2 or 3 or 4 or 5

limit 6 to yr="2019"

## **Appendix B: Data extraction form**

**DATA COLLECTION FORM – SCOPING REVIEW**

*(only headers, no boxes)*

1. **General Information**
   1. Publication ID
   2. EndNote Record Number
   3. Author
   4. Year
   5. Journal
   6. DOI
   7. Definition of study design (e.g. ITS, before-and-after)
   8. Country of study
   9. Study objectives
      1. Study population
      2. Study intervention
      3. Study outcome
   10. Type of intervention (e.g. policy, program, treatment)
   11. Level of intervention (e.g. individual, hospital, district, country)
   12. Participants (e.g. patients, doctors)
       1. Study unit of analysis
       2. Study minimum available cluster
       3. Study longitudinal follow up
2. **Data handling and statistical analysis (research question #1)**
   1. Data source (e.g. prospective, routinely collected)
   2. Data linked? (yes/no)
   3. Type of outcome (e.g. continuous, count, binary)
   4. Data points over time
      1. Number of data points
      2. Data points unit (e.g. week, month, year)
   5. Averaging-step at each time point (for individual level data only: yes/no)
   6. Main statistical model/tool (e.g. segmented regression, mixed models, other)
   7. Confounders
      1. Confounders reported (yes/no)
      2. Confounders adjusted for
   8. Autocorrelation
      1. Autocorrelation reported (yes/no)
      2. Autocorrelation handled with
   9. Seasonality
      1. Seasonality reported (yes/no)
      2. Seasonality handled with
   10. Time-varying confounders
       1. Time varying confounder reported (yes/no)
       2. Time varying confounder handled with
   11. Others methodological issues
       1. Others reported (yes/no)
       2. Others handled with
3. **Missing data handling reported (yes/no) If yes, we will extract:**
   1. Missing data proportion reported
      1. Missing data reported (yes/no)
      2. Missing data proportion (% reported)
   2. Missing data mechanism reported
      1. Missing data mechanism reported (yes/no)
      2. Which missing data mechanism (MAR, MCAR, MNAR)
   3. Missing data handling method applied
      1. Missing data method applied (yes/no)
      2. Which missing data method (CCA, MI, others)
   4. Sensitivity analysis for missing data assumption
      1. Missing data sensitivity analysis reported (yes/no)
      2. Which missing data sensitivity analysis (delta method, others)
4. **Especial notes**

## **Appendix C: List of the 60 selected publications**

| **Table S.4.1. List of the finally selected publications from 2019 for the scoping review (N=60)** | | | | | | | |
| --- | --- | --- | --- | --- | --- | --- | --- |
| **#** | **1st Author** |  | **Journal** | **Country** | **Study Type** | **Population** | **Intervention Type** |
| 1 | Acquisto |  | American Journal of Health-System Pharmacy | USA | ITS | health personnel | program |
| 2 | Adeleke |  | Open Heart | UK | ITS | patients | program |
| 3 | Agarwal |  | JAMA Network Open | USA | ITS | patients | policy |
| 4 | Akazawa |  | Open Forum Infectious Diseases | Japan | ITS | patients | program |
| 5 | Annear |  | BMJ Global Health | Cambodia | ITS | patients | policy |
| 6 | Arruda |  | American Journal of Infection Control | Brazil | ITS | patients | intervention |
| 7 | Barnes |  | American Journal of Cardiology | USA | ITS | patients | guideline/protocol/sound published evidence |
| 8 | Barrio |  | International Journal of Drug Policy | Spain | CITS | patients | policy |
| 9 | Belle |  | Clinical Nutrition | Switzerland | SR | patients | treatment |
| 10 | Berdahl |  | Journal of General Internal Medicine | USA | ITS | patients | policy |
| 11 | Besen |  | Revista Brasileira de Terapia Intensiva | Brazil | ITS | patients | guideline/protocol/sound published evidence |
| 12 | Bruckner |  | International Journal of Epidemiology | France | CITS | patients | relevant or historic event |
| 13 | Bui |  | Journal of Safety Research | USA | ITS | firefighters | intervention |
| 14 | Carlos |  | Journal of the American College of Radiology | USA | ITS | insured women | policy |
| 15 | Close |  | BMJ Open | UK | CITS | health personnel | policy |
| 16 | Flick |  | AIDS | Malawi | ITS | health personnel | intervention |
| 17 | Garriga |  | BMJ Open | UK | ITS | patients | program |
| 18 | Gould |  | Surgery | USA | CITS | patients | policy |
| 19 | Grout |  | Academic pediatrics | USA | ITS | patients | intervention |
| 20 | Guan |  | BMJ Open | China | CITS | medications | policy |
| 21 | Haakenstad |  | Preventive Medicine | USA | ITS | patients | policy |
| 22 | Hallgren |  | Behavior Therapy | USA | ITS | patients | treatment |
| 23 | Hecker |  | American Journal of Infection Control | USA | ITS | patients | treatment |
| 24 | Heinsbroek |  | BMJ Open | UK | ITS | patients | intervention |
| 25 | Holmberg |  | Resuscitation | USA | CITS | patients | guideline/protocol/sound published evidence |
| 26 | Holroyd |  | BMC Geriatrics | Canada | ITS | patients | program |
| 27 | Horng |  | JAMA Network Open | USA | ITS | patients | intervention |
| 28 | Ismail |  | BMC Nephrology | Saudi Arabia | ITS | patients | intervention |
| 29 | Jhuang |  | Scientific Reports | China | ITS | general population | policy |
| 30 | Kim |  | Environment International | South Korea | CITS | general population | policy |
| 31 | Lichtl |  | BMJ Open | Germany | SR | patients | intervention |
| 32 | Liu |  | Canadian Journal of Cardiology | Canada | ITS | patients | program |
| 33 | Lu |  | Preventive Medicine | USA | ITS | patients | policy |
| 34 | Majka |  | American Journal of Medical Quality | USA | ITS | health personnel & patients | intervention |
| 35 | Mamun |  | Canadian Journal of Public Health | Canada | ITS | health personnel & patients | program |
| 36 | Marincowitz |  | BMJ Open | UK | ITS | patients | guideline/protocol/sound published evidence |
| 37 | Martin |  | European Journal of Human Genetics | UK | ITS | general population | guideline/protocol/sound published evidence |
| 38 | Merola |  | Hospital Pharmacy | USA | ITS | health personnel | intervention |
| 39 | Miller |  | Postgraduate Medical Journal | UK | ITS | health personnel | intervention |
| 40 | Miller |  | Journal of Urban Health | USA | ITS | patients | program |
| 41 | Ouldali |  | JAMA Pediatrics | France | ITS | children | program |
| 42 | Parchman |  | Annals of Family Medicine | USA | CITS | health personnel & patients | guideline/protocol/sound published evidence |
| 43 | Parekh |  | Value in Health | USA | ITS | patients | policy |
| 44 | Petruzzo |  | Multiple Sclerosis and Related Disorders | Italy | ITS | patients | guideline/protocol/sound published evidence |
| 45 | Qato |  | JAMA Network Open | USA | CITS | patients | relevant or historic event |
| 46 | Ramaswamy |  | JAMA Network Open | USA | ITS | patients | program |
| 47 | Ranapurwala |  | Pain Medicine | USA | ITS | patients | program |
| 48 | Ribera |  | BMJ Open | Spain | ITS | patients | guideline/protocol/sound published evidence |
| 49 | Ross |  | Journal of the International AIDS Society | Rwanda | ITS | patients | policy |
| 50 | Roychoudhury |  | Pediatric Neurology | Canada | ITS | patients | program |
| 51 | Sadan |  | Injury | Israel | ITS | health personnel & patients | intervention |
| 52 | Schwartz |  | Clinical Infectious Diseases | Bangladesh | CITS | children | intervention |
| 53 | Shah |  | Journal of Surgical Education | USA | ITS | health personnel | intervention |
| 54 | Singer |  | JAMA Network Open | USA | ITS | patients | policy |
| 55 | Smith |  | Journal of Pediatric Health Care | USA | ITS | health personnel & patients | program |
| 56 | Sugg |  | Preventive Medicine Reports | USA | ITS | general population | relevant or historic event |
| 57 | Tufts |  | HPB | USA | ITS | patients | intervention |
| 58 | Tyler |  | Hospital Pediatrics | USA | ITS | patients | guideline/protocol/sound published evidence |
| 59 | Van Seben |  | BMJ Open | Netherlands | ITS | health personnel & patients | program |
| 60 | Wassie |  | Public Health Nutrition | Australia | ITS | children | policy |
|  | | | | | | | |

## **Appendix D: Cross-table between level of intervention and more granulated clusters**

| **Table S.4.2. Cross-table between level of intervention and more granulated clusters available (N=60)** | | | | | | | | | | | |
| --- | --- | --- | --- | --- | --- | --- | --- | --- | --- | --- | --- |
|  | **Minimal Available Cluster (More Granulated)** | | | | | | | | | |  |
| **Level of Intervention** | **GP** | **district** | **fire department** | **group of patients (by Dx)** | **health facility** | **hospital** | **hospital unit** | **household** | **individual-level** | **medications** | **Total** |
| **cities, group of** | 0 | 0 | 0 | 0 | 1 | 0 | 0 | 0 | 0 | 0 | **1** |
| **city/district** | 1 | 1 | 0 | 0 | 0 | 1 | 0 | 0 | 0 | 0 | **3** |
| **country** | 0 | 0 | 0 | 0 | 2 | 4 | 0 | 1 | 9 | 1 | **17** |
| **hospital** | 0 | 0 | 0 | 1 | 0 | 2 | 2 | 0 | 13 | 0 | **18** |
| **hospitals, group of** | 1 | 0 | 0 | 0 | 0 | 1 | 1 | 0 | 5 | 0 | **8** |
| **individual-level** | 0 | 0 | 0 | 0 | 0 | 0 | 0 | 0 | 2 | 0 | **2** |
| **state/province/county** | 1 | 1 | 0 | 0 | 0 | 5 | 0 | 0 | 3 | 0 | **10** |
| **three fire departments** | 0 | 0 | 1 | 0 | 0 | 0 | 0 | 0 | 0 | 0 | **1** |
| **Total** | **3** | **2** | **1** | **1** | **3** | **13** | **3** | **1** | **32** | **1** | **60** |
|  | | | | | | | | | | | |

## **Appendix E: Cross-table between averaging-step and statistical model**

| **Table S.4.3. Cross-table between main statistical model and averaging-step (N=60)** | | | | |
| --- | --- | --- | --- | --- |
| **Main Statistical Model** | **Averaging-step** | | | |
| no | unclear | yes | **Total** |
| **ARIMA** | 0 | 0 | 7 | **7** |
| **Jointpoint (Exploratory Method)** | 0 | 1 | 0 | **1** |
| **SR-GEE** | 5 | 0 | 2 | **7** |
| **SR-GLM** | 1 | 0 | 14 | **15** |
| **SR-GLS** | 0 | 0 | 1 | **1** |
| **SR-OLS** | 0 | 1 | 22 | **23** |
| **mixed effects (random intercept only)** | 1 | 0 | 1 | **2** |
| **mixed effects (random intercept & slopes)** | 4 | 0 | 0 | **4** |
| **Total** | **11** | **2** | **47** | **60** |
|  | | | | |

## **Appendix F: Example depiction of MNAR due to data aggregation**

**Example: outcome is weight in kg and covariate is sex.**

**Data before the averaging-step Data after the averaging-step**

Averaging-step = simple average of weight

**(one time-point only)**  **(one time-point only)**

| Patient | Time-point | Sex | Weight |
| --- | --- | --- | --- |
| 1 | Week-1 | Woman | 56 |
| 2 | Week-1 | Woman | 55 |
| 3 | Week-1 | Woman | 61 |
| 4 | Week-1 | Woman | 50 |
| 5 | Week-1 | Woman | 52 |
| 6 | Week-1 | Man | 98 |
| 7 | Week-1 | Man | 97 |
| 8 | Week-1 | Man | 95 |
| 9 | Week-1 | Man | Missing |
| 10 | Week-1 | Man | Missing |

| Time-point | Weight (average) |
| --- | --- |
| Week-1 | 70.5 |

The average weight (70.5 kg) is biased (likely under-estimated) because, on average, men weigh more than women and men has more missing values than women (MAR at the individual-level).

**Why weight is now MNAR?**

In aggregate data, the average weight does not content any information from sex. Thus, sex is now unobserved in the dataset, but we know that sex explains the missingness of weight data. Therefore, after a simple data aggregation, weight is now MNAR on sex.

**Note:** we could use another type of average to preserve sex information (e.g. weighted average), but in practice this is hard because missing data on covariates is common as well. For more details, we recommend reading: Bazo-Alvarez JC, Morris TP, Pham TM, Carpenter JR, Petersen I. Handling Missing Values in Interrupted Time Series Analysis of Longitudinal Individual-Level Data. Clinical Epidemiology. 2020;12:1045.

## **Appendix G: Seasonality and individual-level data missingness**


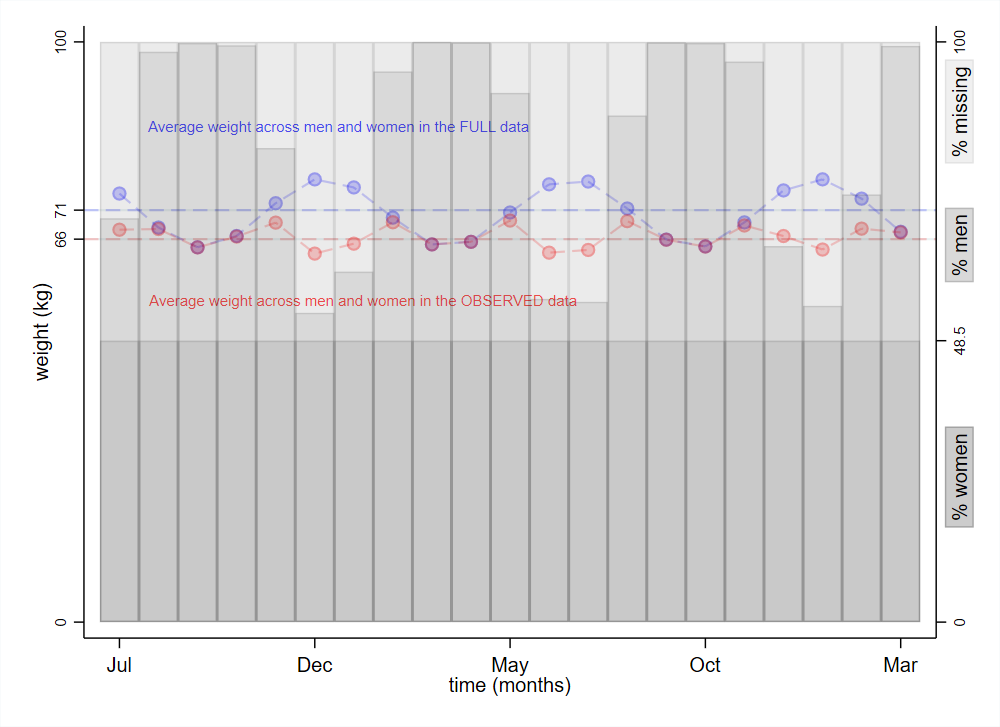


The above figure depicts a simulated scenario that shows how missing data at the individual level can affect the way we observe seasonality at the aggregated level. In this example, women weight is fully recorded over time, the proportion of men observed at each time point varies over time, and all men weigh more than women. The blue-dashed line shows the average weight (71kg) and seasonality that we would see if there were not such as MAR mechanism (full data). The red-dashed line shows the average weight (66kg) and seasonality that we see due to that MAR mechanism (observed data). The observed average weight is lower than the real one, and the observed seasonal waves (red) are narrower than the real ones (blue). These differences affect the estimated trajectories and standard errors when the time series are modelled.
